# Supplementary material for: Ternary CNTs@TiO2/CoO Nanotube Composites: Improved Anode Materials for High Performance Lithium Ion Batteries
Source: PubMed Central journal article supplement (PMC5554059; doi:10.3390/ma10060678), 2017-06-20
Supplement: materials-10-00678-s001.pdf [file materials-10-00678-s001.pdf]

# Supplementary Materials: Ternary CNTs@TiO<sub>2</sub>/CoO Nanotube Composites: Improved Anode Materials for High Performance Lithium Ion Batteries

Mahmoud Madian, Raghunandan Ummethala, Ahmed Osama Abo El Naga, Nahla Ismail, Mark Hermann Rummeli, Alexander Eychmüller and Lars Giebeler

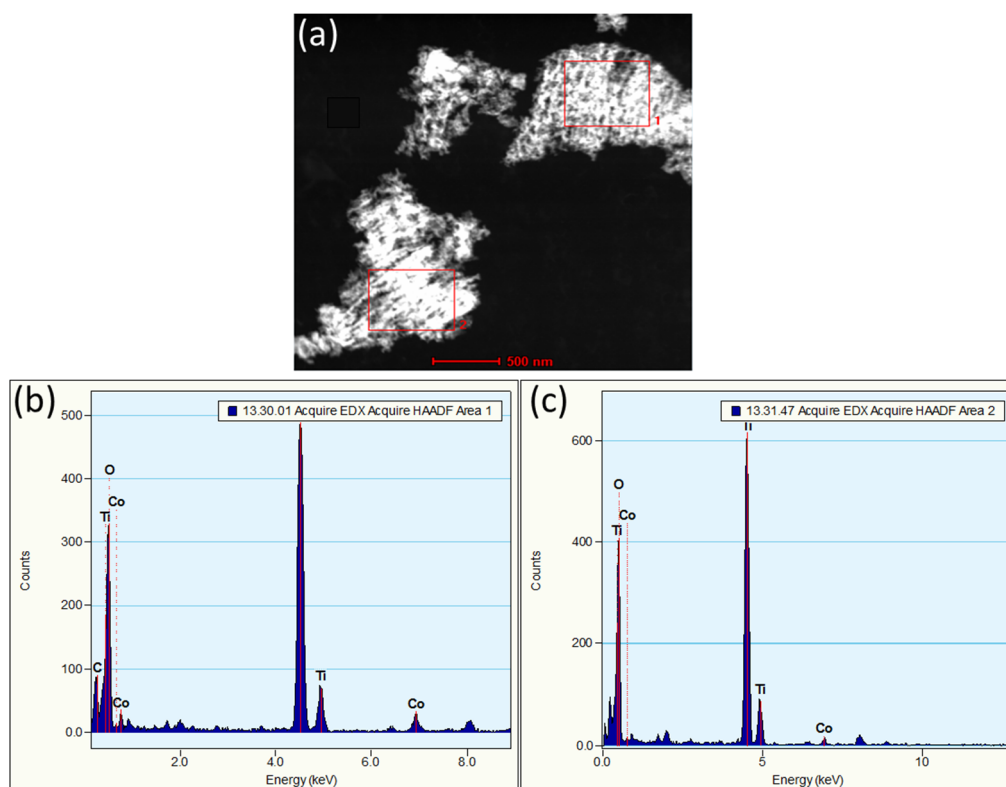

**Figure S1.** STEM image of individual nanotubes (a) and the STEM-EDXS analysis confirming that the tubes are composed of Ti and Co oxides (b,c).

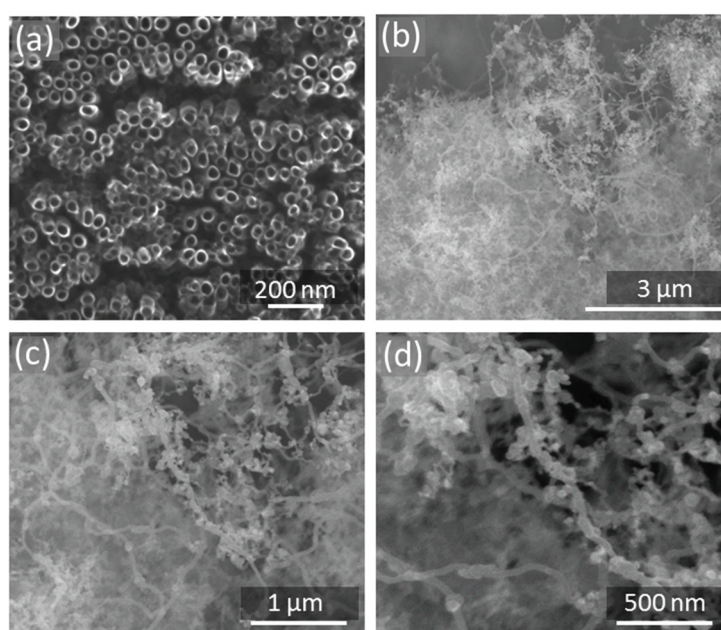

**Figure S2.** SEM images showing pure TiO<sub>2</sub> nanotubes prepared at 60 V on the Ti substrate (a) and surface overview after CNT covering at different magnifications (b–d).

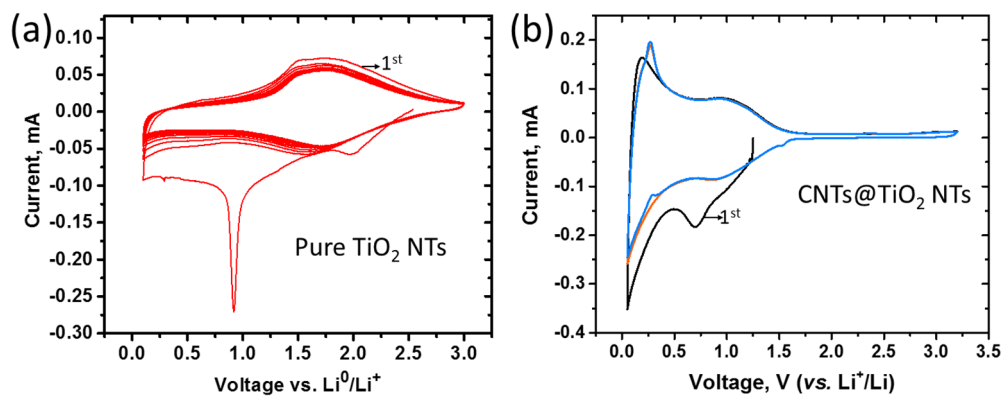

**Figure S3.** Cyclic voltammograms of pure TiO<sub>2</sub> nanotubes (a) and CNTs@TiO<sub>2</sub> NTs (b), measured at scan rates of 0.1 mV·s<sup>-1</sup>.

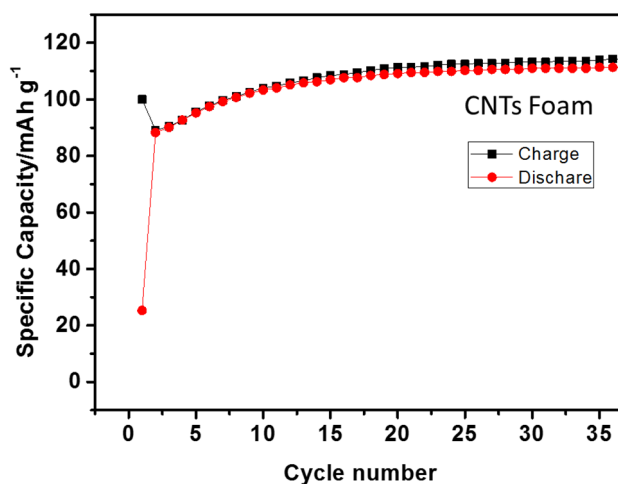

**Figure S4.** Galvanostatic cycling of CNTs foam at a current rate of 446 mA·g<sup>-1</sup> between 0.1 and 3 V.

The mass of CNTs foam electrode was 2.730 mg. mass of TiO/CoO NT + mass of CNTs is termed as CNTs@TiO<sub>2</sub>/CoO NT. The current density of the CNTs foam was calculated based on the average mass of CNTs@TiO<sub>2</sub>/CoO NT (1.12 mg) that was tested at 500 μA. Therefore, the current needed for 2.730 mg CNTs is 1.218 mA, which corresponds to 446 mA·g<sup>-1</sup>.

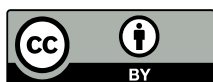

© 2017 by the authors. Submitted for possible open access publication under the terms and conditions of the Creative Commons Attribution (CC BY) license (<http://creativecommons.org/licenses/by/4.0/>).
